# Supplementary material for: Prickly Sida (Sida spinosa L.) and Cotton Response to Pre- and Early Post-Emergence Herbicides
Source: MDPI journal article supplement (doi:10.3390/agronomy13102466), 2023-09-24
Supplement: s1 [file s1]

Supplementary material

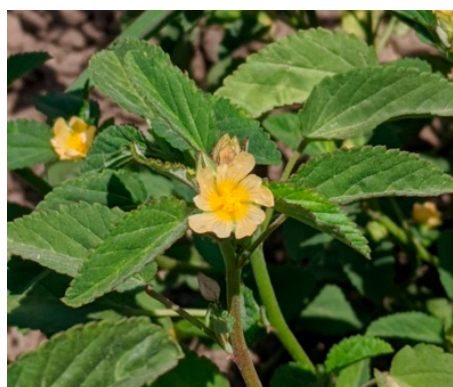

(a)

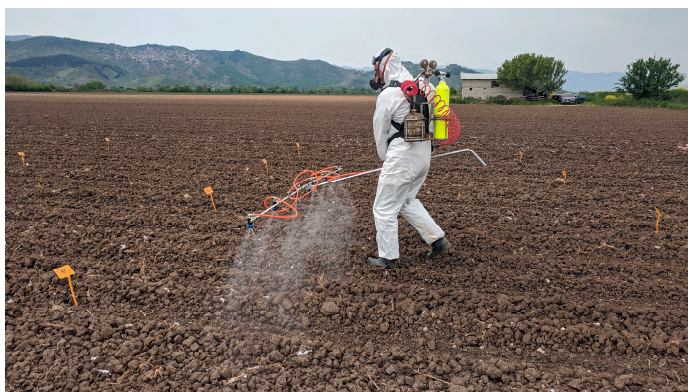

(b)

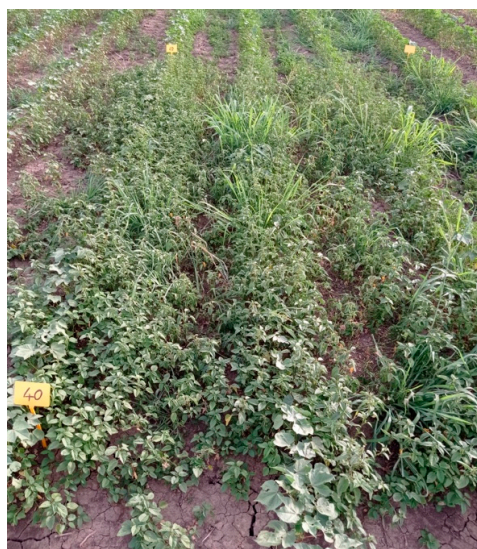

(c)

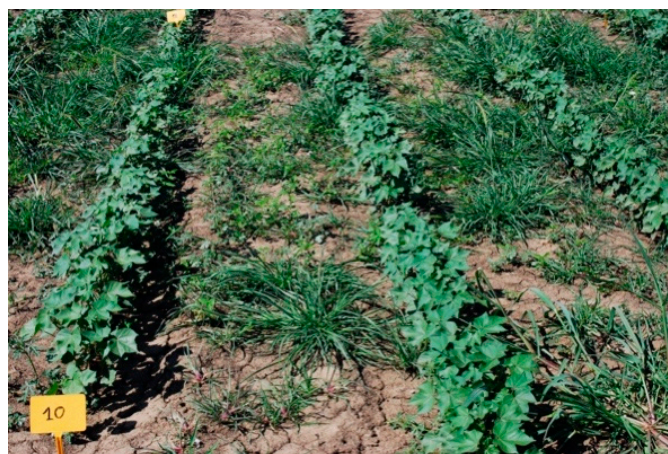

(d)

**Figure S1.** Flowering prickly sida plant (a), application of PRE herbicides with an AZO boom sprayer (b), and view of the untreated weedy check in late June 2021 (c) and 2022 (d).

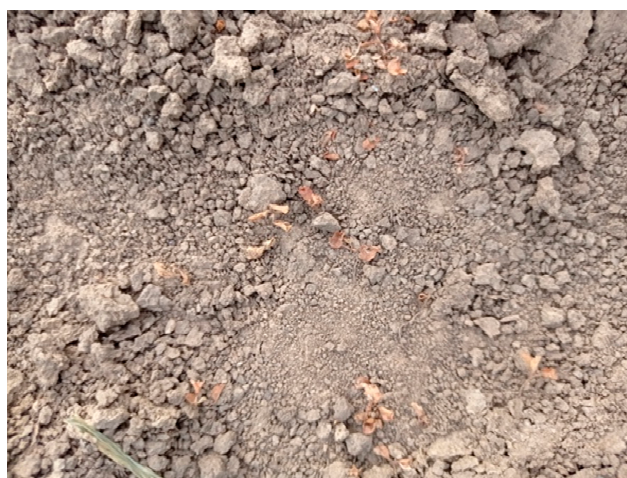

**Figure S2.** Dead prickly sida plants at 2-3 leaf stage, 8 WAT with pyriithiobac PRE, in late June 2021.
